# Supplementary material
Source: PubMed Central journal article supplement (PMC3794474)

**Neurosteroid Analogues. 16. A new explanation for the lack of anesthetic effects of  $\Delta^{16}$ -alphaxalone and identification of a  $\Delta^{17(20)}$  analogue with potent anesthetic activity**

Eva Stastna, Kathiresan Krishnan, Brad D. Manion, Amanda Taylor, Nigam P. Rath, Zi-Wei Chen, Alex. S. Evers, Charles F. Zorumski, Steven Mennerick, Douglas F. Covey

Supporting Information

Table of Contents

|                                                                           |        |
|---------------------------------------------------------------------------|--------|
| Elemental Analyses for Compounds <b>5a,5b,5c,6a,6b,6c,9,12a,12b</b> ..... | S2     |
| X-ray Crystallographic Data for Compound <b>6a</b> .....                  | S3–S14 |
| Projection Views for Compound <b>6a</b> .....                             | S15    |

## Elemental Analysis Results.

**5a:** Calcd for  $C_{20}H_{28}O_3$ : C, 75.91 %; H, 8.92 %. Found: C, 75.73%; H, 9.04%.

**5b:** Calcd for  $C_{20}H_{30}O_3$ : C, 75.43 %; H, 9.50 %. Found: C, 75.21%; H, 9.73%.

**5c:** Calcd for  $C_{21}H_{31}NO_2$ : C, 76.55 %; H, 9.48 %; N, 4.25 %. Found. C, 76.37 %; H, 9.36 %; N, 4.01 %.

**6a:** Calcd for  $C_{21}H_{29}NO_2$ : C, 77.02 %; H, 8.93 %; N, 4.28 %. Found. C, 77.17 %; H, 9.13 %; N, 4.26 %.

**6b:** Calcd for  $C_{21}H_{29}NO_2$ : C, 77.02 %; H, 8.93 %; N, 4.28 %. Found. C, 76.91 %; H, 8.86 %; N, 4.21 %.

**6c:** Calcd for  $C_{22}H_{31}NO_2$ : C, 77.38 %; H, 9.15 %; N, 4.10. Found: C, 77.19 %; H, 9.14 %; N, 3.86 %.

**6d:** Calcd for  $C_{22}H_{31}NO_2$ : C, 77.38 %; H, 9.15 %; N, 4.10. Found: C, 77.52 %; H, 9.24 %; N, 4.01 %.

**9:** Calcd for  $C_{22}H_{32}O_4$ : C, 73.30 %; H, 8.95 %. Found: C, 73.10 %; H, 8.74 %.

**12a:** Calcd for  $C_{24}H_{33}NO_3$ : C, 75.16 %; H, 8.67 %; N, 3.65 %. Found: C, 75.33 %; H, 8.79 %; N, 3.47 %.

**12b:** Calcd for  $C_{24}H_{33}NO_3$ : C, 75.16 %; H, 8.67 %; N, 3.65 %. Found: C, 75.33 %; H, 8.66 %; N, 3.60 %.

Table 1. Crystal data and structure refinement for compound **6a**.

|                                   |                                                  |          |
|-----------------------------------|--------------------------------------------------|----------|
| Identification code               | d33309/lt/ES-88                                  |          |
| Empirical formula                 | C <sub>21</sub> H <sub>29</sub> N O <sub>2</sub> |          |
| Formula weight                    | 327.45                                           |          |
| Temperature                       | 100(2) K                                         |          |
| Wavelength                        | 0.71073 Å                                        |          |
| Crystal system                    | Orthorhombic                                     |          |
| Space group                       | P2 <sub>1</sub> 2 <sub>1</sub> 2                 |          |
| Unit cell dimensions              | a = 9.7973(6) Å                                  | α = 90°. |
|                                   | b = 23.7370(14) Å                                | β = 90°. |
|                                   | c = 7.7783(5) Å                                  | γ = 90°. |
| Volume                            | 1808.91(19) Å <sup>3</sup>                       |          |
| Z                                 | 4                                                |          |
| Density (calculated)              | 1.202 Mg/m <sup>3</sup>                          |          |
| Absorption coefficient            | 0.076 mm <sup>-1</sup>                           |          |
| F(000)                            | 712                                              |          |
| Crystal size                      | 0.44 x 0.28 x 0.17 mm <sup>3</sup>               |          |
| Theta range for data collection   | 1.72 to 34.03°.                                  |          |
| Index ranges                      | -15 ≤ h ≤ 15, -37 ≤ k ≤ 36, -12 ≤ l ≤ 11         |          |
| Reflections collected             | 49316                                            |          |
| Independent reflections           | 7320 [R(int) = 0.0338]                           |          |
| Completeness to theta = 25.00°    | 100.0 %                                          |          |
| Absorption correction             | Semi-empirical from equivalents                  |          |
| Max. and min. transmission        | 0.9870 and 0.9674                                |          |
| Refinement method                 | Full-matrix least-squares on F <sup>2</sup>      |          |
| Data / restraints / parameters    | 7320 / 0 / 220                                   |          |
| Goodness-of-fit on F <sup>2</sup> | 1.075                                            |          |
| Final R indices [I > 2σ(I)]       | R1 = 0.0343, wR2 = 0.0904                        |          |
| R indices (all data)              | R1 = 0.0377, wR2 = 0.0931                        |          |
| Absolute structure parameter      | 0.2(6)                                           |          |
| Largest diff. peak and hole       | 0.355 and -0.175 e.Å <sup>-3</sup>               |          |

Table 2. Atomic coordinates ( $\times 10^4$ ) and equivalent isotropic displacement parameters ( $\text{\AA}^2 \times 10^3$ ) for dc33309.  $U(\text{eq})$  is defined as one third of the trace of the orthogonalized  $U^{ij}$  tensor.

|       | x       | y       | z        | U(eq) |
|-------|---------|---------|----------|-------|
| O(3)  | 7720(1) | 9448(1) | 7324(1)  | 21(1) |
| O(11) | 5276(1) | 7276(1) | 10003(1) | 31(1) |
| N(21) | 6798(2) | 5228(1) | 9787(1)  | 48(1) |
| C(1)  | 6341(1) | 8450(1) | 9112(1)  | 17(1) |
| C(2)  | 6107(1) | 9079(1) | 9458(1)  | 19(1) |
| C(3)  | 6315(1) | 9442(1) | 7858(1)  | 17(1) |
| C(4)  | 5484(1) | 9220(1) | 6351(1)  | 17(1) |
| C(5)  | 5743(1) | 8591(1) | 6027(1)  | 13(1) |
| C(6)  | 4999(1) | 8386(1) | 4419(1)  | 16(1) |
| C(7)  | 5368(1) | 7775(1) | 4001(1)  | 16(1) |
| C(8)  | 5157(1) | 7378(1) | 5528(1)  | 12(1) |
| C(9)  | 5877(1) | 7613(1) | 7166(1)  | 13(1) |
| C(10) | 5439(1) | 8222(1) | 7633(1)  | 13(1) |
| C(11) | 5785(1) | 7179(1) | 8611(1)  | 17(1) |
| C(12) | 6337(1) | 6593(1) | 8202(1)  | 18(1) |
| C(13) | 5562(1) | 6365(1) | 6629(1)  | 13(1) |
| C(14) | 5735(1) | 6794(1) | 5145(1)  | 12(1) |
| C(15) | 5259(1) | 6471(1) | 3552(1)  | 16(1) |
| C(16) | 5885(1) | 5883(1) | 3849(1)  | 18(1) |
| C(17) | 6085(1) | 5832(1) | 5775(1)  | 15(1) |
| C(18) | 4056(1) | 6256(1) | 7117(1)  | 19(1) |
| C(19) | 3923(1) | 8244(1) | 8158(1)  | 18(1) |
| C(20) | 6614(1) | 5370(1) | 6514(1)  | 23(1) |
| C(21) | 6725(1) | 5301(1) | 8332(1)  | 32(1) |

Table 3. Bond lengths [ $\text{\AA}$ ] and angles [ $^\circ$ ] for dc33309.

---

|             |            |
|-------------|------------|
| O(3)-C(3)   | 1.4374(10) |
| O(3)-H(3)   | 0.8400     |
| O(11)-C(11) | 1.2140(10) |
| N(21)-C(21) | 1.1471(14) |
| C(1)-C(2)   | 1.5343(10) |
| C(1)-C(10)  | 1.5486(10) |
| C(1)-H(1A)  | 0.9900     |
| C(1)-H(1B)  | 0.9900     |
| C(2)-C(3)   | 1.5270(11) |
| C(2)-H(2A)  | 0.9900     |
| C(2)-H(2B)  | 0.9900     |
| C(3)-C(4)   | 1.5225(11) |
| C(3)-H(3A)  | 1.0000     |
| C(4)-C(5)   | 1.5347(10) |
| C(4)-H(4A)  | 0.9900     |
| C(4)-H(4B)  | 0.9900     |
| C(5)-C(6)   | 1.5271(10) |
| C(5)-C(10)  | 1.5537(10) |
| C(5)-H(5)   | 1.0000     |
| C(6)-C(7)   | 1.5303(10) |
| C(6)-H(6A)  | 0.9900     |
| C(6)-H(6B)  | 0.9900     |
| C(7)-C(8)   | 1.5309(10) |
| C(7)-H(7A)  | 0.9900     |
| C(7)-H(7B)  | 0.9900     |
| C(8)-C(14)  | 1.5265(9)  |
| C(8)-C(9)   | 1.5601(10) |
| C(8)-H(8)   | 1.0000     |
| C(9)-C(11)  | 1.5269(10) |
| C(9)-C(10)  | 1.5521(9)  |
| C(9)-H(9)   | 1.0000     |
| C(10)-C(19) | 1.5406(10) |
| C(11)-C(12) | 1.5262(10) |
| C(12)-C(13) | 1.5381(10) |

|              |            |
|--------------|------------|
| C(12)-H(12A) | 0.9900     |
| C(12)-H(12B) | 0.9900     |
| C(13)-C(17)  | 1.5177(10) |
| C(13)-C(18)  | 1.5454(11) |
| C(13)-C(14)  | 1.5478(10) |
| C(14)-C(15)  | 1.5297(10) |
| C(14)-H(14)  | 1.0000     |
| C(15)-C(16)  | 1.5419(10) |
| C(15)-H(15A) | 0.9900     |
| C(15)-H(15B) | 0.9900     |
| C(16)-C(17)  | 1.5157(11) |
| C(16)-H(16A) | 0.9900     |
| C(16)-H(16B) | 0.9900     |
| C(17)-C(20)  | 1.3428(10) |
| C(18)-H(18A) | 0.9800     |
| C(18)-H(18B) | 0.9800     |
| C(18)-H(18C) | 0.9800     |
| C(19)-H(19A) | 0.9800     |
| C(19)-H(19B) | 0.9800     |
| C(19)-H(19C) | 0.9800     |
| C(20)-C(21)  | 1.4283(14) |
| C(20)-H(20)  | 0.9500     |

|                  |           |
|------------------|-----------|
| C(3)-O(3)-H(3)   | 109.5     |
| C(2)-C(1)-C(10)  | 112.62(6) |
| C(2)-C(1)-H(1A)  | 109.1     |
| C(10)-C(1)-H(1A) | 109.1     |
| C(2)-C(1)-H(1B)  | 109.1     |
| C(10)-C(1)-H(1B) | 109.1     |
| H(1A)-C(1)-H(1B) | 107.8     |
| C(3)-C(2)-C(1)   | 112.73(6) |
| C(3)-C(2)-H(2A)  | 109.0     |
| C(1)-C(2)-H(2A)  | 109.0     |
| C(3)-C(2)-H(2B)  | 109.0     |
| C(1)-C(2)-H(2B)  | 109.0     |
| H(2A)-C(2)-H(2B) | 107.8     |

|                  |           |
|------------------|-----------|
| O(3)-C(3)-C(4)   | 107.02(6) |
| O(3)-C(3)-C(2)   | 111.66(6) |
| C(4)-C(3)-C(2)   | 111.11(6) |
| O(3)-C(3)-H(3A)  | 109.0     |
| C(4)-C(3)-H(3A)  | 109.0     |
| C(2)-C(3)-H(3A)  | 109.0     |
| C(3)-C(4)-C(5)   | 112.04(6) |
| C(3)-C(4)-H(4A)  | 109.2     |
| C(5)-C(4)-H(4A)  | 109.2     |
| C(3)-C(4)-H(4B)  | 109.2     |
| C(5)-C(4)-H(4B)  | 109.2     |
| H(4A)-C(4)-H(4B) | 107.9     |
| C(6)-C(5)-C(4)   | 111.40(6) |
| C(6)-C(5)-C(10)  | 112.80(6) |
| C(4)-C(5)-C(10)  | 112.58(6) |
| C(6)-C(5)-H(5)   | 106.5     |
| C(4)-C(5)-H(5)   | 106.5     |
| C(10)-C(5)-H(5)  | 106.5     |
| C(5)-C(6)-C(7)   | 111.30(6) |
| C(5)-C(6)-H(6A)  | 109.4     |
| C(7)-C(6)-H(6A)  | 109.4     |
| C(5)-C(6)-H(6B)  | 109.4     |
| C(7)-C(6)-H(6B)  | 109.4     |
| H(6A)-C(6)-H(6B) | 108.0     |
| C(6)-C(7)-C(8)   | 112.80(6) |
| C(6)-C(7)-H(7A)  | 109.0     |
| C(8)-C(7)-H(7A)  | 109.0     |
| C(6)-C(7)-H(7B)  | 109.0     |
| C(8)-C(7)-H(7B)  | 109.0     |
| H(7A)-C(7)-H(7B) | 107.8     |
| C(14)-C(8)-C(7)  | 110.96(6) |
| C(14)-C(8)-C(9)  | 108.46(5) |
| C(7)-C(8)-C(9)   | 110.60(5) |
| C(14)-C(8)-H(8)  | 108.9     |
| C(7)-C(8)-H(8)   | 108.9     |
| C(9)-C(8)-H(8)   | 108.9     |

|                     |           |
|---------------------|-----------|
| C(11)-C(9)-C(10)    | 116.13(6) |
| C(11)-C(9)-C(8)     | 109.41(6) |
| C(10)-C(9)-C(8)     | 113.55(5) |
| C(11)-C(9)-H(9)     | 105.6     |
| C(10)-C(9)-H(9)     | 105.6     |
| C(8)-C(9)-H(9)      | 105.6     |
| C(19)-C(10)-C(1)    | 109.99(6) |
| C(19)-C(10)-C(9)    | 111.05(5) |
| C(1)-C(10)-C(9)     | 109.95(5) |
| C(19)-C(10)-C(5)    | 112.31(6) |
| C(1)-C(10)-C(5)     | 106.91(6) |
| C(9)-C(10)-C(5)     | 106.49(5) |
| O(11)-C(11)-C(12)   | 120.26(7) |
| O(11)-C(11)-C(9)    | 123.58(7) |
| C(12)-C(11)-C(9)    | 116.13(6) |
| C(11)-C(12)-C(13)   | 108.12(6) |
| C(11)-C(12)-H(12A)  | 110.1     |
| C(13)-C(12)-H(12A)  | 110.1     |
| C(11)-C(12)-H(12B)  | 110.1     |
| C(13)-C(12)-H(12B)  | 110.1     |
| H(12A)-C(12)-H(12B) | 108.4     |
| C(17)-C(13)-C(12)   | 118.29(6) |
| C(17)-C(13)-C(18)   | 106.90(6) |
| C(12)-C(13)-C(18)   | 109.57(6) |
| C(17)-C(13)-C(14)   | 100.60(5) |
| C(12)-C(13)-C(14)   | 107.93(5) |
| C(18)-C(13)-C(14)   | 113.46(6) |
| C(8)-C(14)-C(15)    | 119.98(6) |
| C(8)-C(14)-C(13)    | 114.22(6) |
| C(15)-C(14)-C(13)   | 103.95(5) |
| C(8)-C(14)-H(14)    | 105.9     |
| C(15)-C(14)-H(14)   | 105.9     |
| C(13)-C(14)-H(14)   | 105.9     |
| C(14)-C(15)-C(16)   | 102.18(6) |
| C(14)-C(15)-H(15A)  | 111.3     |
| C(16)-C(15)-H(15A)  | 111.3     |



|                     |            |
|---------------------|------------|
| C(14)-C(15)-H(15B)  | 111.3      |
| C(16)-C(15)-H(15B)  | 111.3      |
| H(15A)-C(15)-H(15B) | 109.2      |
| C(17)-C(16)-C(15)   | 105.71(6)  |
| C(17)-C(16)-H(16A)  | 110.6      |
| C(15)-C(16)-H(16A)  | 110.6      |
| C(17)-C(16)-H(16B)  | 110.6      |
| C(15)-C(16)-H(16B)  | 110.6      |
| H(16A)-C(16)-H(16B) | 108.7      |
| C(20)-C(17)-C(16)   | 122.50(7)  |
| C(20)-C(17)-C(13)   | 128.63(7)  |
| C(16)-C(17)-C(13)   | 108.85(6)  |
| C(13)-C(18)-H(18A)  | 109.5      |
| C(13)-C(18)-H(18B)  | 109.5      |
| H(18A)-C(18)-H(18B) | 109.5      |
| C(13)-C(18)-H(18C)  | 109.5      |
| H(18A)-C(18)-H(18C) | 109.5      |
| H(18B)-C(18)-H(18C) | 109.5      |
| C(10)-C(19)-H(19A)  | 109.5      |
| C(10)-C(19)-H(19B)  | 109.5      |
| H(19A)-C(19)-H(19B) | 109.5      |
| C(10)-C(19)-H(19C)  | 109.5      |
| H(19A)-C(19)-H(19C) | 109.5      |
| H(19B)-C(19)-H(19C) | 109.5      |
| C(17)-C(20)-C(21)   | 123.20(8)  |
| C(17)-C(20)-H(20)   | 118.4      |
| C(21)-C(20)-H(20)   | 118.4      |
| N(21)-C(21)-C(20)   | 177.83(13) |

---

Table 4. Anisotropic displacement parameters ( $\text{\AA}^2 \times 10^3$ ) for dc33309. The anisotropic displacement factor exponent takes the form:  $-2\pi^2 [ h^2 a^{*2} U^{11} + \dots + 2 h k a^* b^* U^{12} ]$

|       | U <sup>11</sup> | U <sup>22</sup> | U <sup>33</sup> | U <sup>23</sup> | U <sup>13</sup> | U <sup>12</sup> |
|-------|-----------------|-----------------|-----------------|-----------------|-----------------|-----------------|
| O(3)  | 18(1)           | 20(1)           | 26(1)           | -7(1)           | 0(1)            | -2(1)           |
| O(11) | 62(1)           | 19(1)           | 12(1)           | 1(1)            | 7(1)            | 6(1)            |
| N(21) | 87(1)           | 30(1)           | 28(1)           | 6(1)            | -7(1)           | 28(1)           |
| C(1)  | 22(1)           | 15(1)           | 14(1)           | -2(1)           | -4(1)           | 1(1)            |
| C(2)  | 23(1)           | 16(1)           | 17(1)           | -5(1)           | -2(1)           | 2(1)            |
| C(3)  | 17(1)           | 13(1)           | 19(1)           | -3(1)           | -1(1)           | 1(1)            |
| C(4)  | 20(1)           | 13(1)           | 18(1)           | 0(1)            | -3(1)           | 1(1)            |
| C(5)  | 15(1)           | 12(1)           | 13(1)           | 0(1)            | -1(1)           | 0(1)            |
| C(6)  | 21(1)           | 14(1)           | 13(1)           | 2(1)            | -3(1)           | -1(1)           |
| C(7)  | 24(1)           | 13(1)           | 10(1)           | 1(1)            | -1(1)           | -1(1)           |
| C(8)  | 16(1)           | 12(1)           | 10(1)           | 0(1)            | -1(1)           | 0(1)            |
| C(9)  | 16(1)           | 12(1)           | 10(1)           | 0(1)            | -1(1)           | 1(1)            |
| C(10) | 15(1)           | 12(1)           | 11(1)           | -1(1)           | 0(1)            | 0(1)            |
| C(11) | 28(1)           | 14(1)           | 10(1)           | 1(1)            | -3(1)           | 1(1)            |
| C(12) | 26(1)           | 15(1)           | 13(1)           | 1(1)            | -4(1)           | 4(1)            |
| C(13) | 16(1)           | 12(1)           | 11(1)           | 1(1)            | -1(1)           | 2(1)            |
| C(14) | 15(1)           | 12(1)           | 10(1)           | 0(1)            | 0(1)            | -1(1)           |
| C(15) | 22(1)           | 13(1)           | 12(1)           | -1(1)           | -2(1)           | -1(1)           |
| C(16) | 25(1)           | 14(1)           | 15(1)           | -2(1)           | -1(1)           | 0(1)            |
| C(17) | 18(1)           | 13(1)           | 15(1)           | 0(1)            | 0(1)            | 0(1)            |
| C(18) | 20(1)           | 17(1)           | 21(1)           | 5(1)            | 6(1)            | 1(1)            |
| C(19) | 17(1)           | 18(1)           | 18(1)           | -1(1)           | 4(1)            | 0(1)            |
| C(20) | 31(1)           | 17(1)           | 20(1)           | 0(1)            | -2(1)           | 8(1)            |
| C(21) | 51(1)           | 19(1)           | 27(1)           | 3(1)            | -4(1)           | 16(1)           |

Table 5. Hydrogen coordinates ( $\times 10^4$ ) and isotropic displacement parameters ( $\text{\AA}^2 \times 10^{-3}$ ) for dc33309.

|        | x    | y    | z     | U(eq) |
|--------|------|------|-------|-------|
| H(3)   | 8183 | 9636 | 8031  | 32    |
| H(1A)  | 6142 | 8235 | 10173 | 20    |
| H(1B)  | 7313 | 8389 | 8818  | 20    |
| H(2A)  | 5165 | 9134 | 9888  | 22    |
| H(2B)  | 6744 | 9206 | 10367 | 22    |
| H(3A)  | 6021 | 9837 | 8118  | 20    |
| H(4A)  | 5722 | 9435 | 5303  | 20    |
| H(4B)  | 4501 | 9279 | 6586  | 20    |
| H(5)   | 6741 | 8551 | 5788  | 16    |
| H(6A)  | 5246 | 8630 | 3434  | 19    |
| H(6B)  | 4002 | 8416 | 4600  | 19    |
| H(7A)  | 6335 | 7758 | 3636  | 19    |
| H(7B)  | 4800 | 7645 | 3026  | 19    |
| H(8)   | 4157 | 7343 | 5762  | 15    |
| H(9)   | 6868 | 7638 | 6866  | 15    |
| H(12A) | 6202 | 6340 | 9198  | 21    |
| H(12B) | 7326 | 6614 | 7949  | 21    |
| H(14)  | 6741 | 6847 | 5002  | 15    |
| H(15A) | 5612 | 6645 | 2485  | 19    |
| H(15B) | 4250 | 6452 | 3495  | 19    |
| H(16A) | 5263 | 5585 | 3426  | 22    |
| H(16B) | 6770 | 5849 | 3242  | 22    |
| H(18A) | 3559 | 6118 | 6108  | 29    |
| H(18B) | 3639 | 6608 | 7519  | 29    |
| H(18C) | 4014 | 5974 | 8034  | 29    |
| H(19A) | 3795 | 8035 | 9233  | 27    |
| H(19B) | 3365 | 8073 | 7251  | 27    |
| H(19C) | 3646 | 8637 | 8323  | 27    |
| H(20)  | 6928 | 5075 | 5791  | 27    |

Table 6. Torsion angles [°] for dc33309.

---

|                        |            |
|------------------------|------------|
| C(10)-C(1)-C(2)-C(3)   | -55.66(9)  |
| C(1)-C(2)-C(3)-O(3)    | -67.57(8)  |
| C(1)-C(2)-C(3)-C(4)    | 51.83(9)   |
| O(3)-C(3)-C(4)-C(5)    | 69.80(8)   |
| C(2)-C(3)-C(4)-C(5)    | -52.34(8)  |
| C(3)-C(4)-C(5)-C(6)    | -175.07(6) |
| C(3)-C(4)-C(5)-C(10)   | 57.07(8)   |
| C(4)-C(5)-C(6)-C(7)    | 174.52(6)  |
| C(10)-C(5)-C(6)-C(7)   | -57.73(8)  |
| C(5)-C(6)-C(7)-C(8)    | 53.10(8)   |
| C(6)-C(7)-C(8)-C(14)   | -171.44(6) |
| C(6)-C(7)-C(8)-C(9)    | -51.02(8)  |
| C(14)-C(8)-C(9)-C(11)  | -51.90(7)  |
| C(7)-C(8)-C(9)-C(11)   | -173.80(6) |
| C(14)-C(8)-C(9)-C(10)  | 176.57(6)  |
| C(7)-C(8)-C(9)-C(10)   | 54.67(8)   |
| C(2)-C(1)-C(10)-C(19)  | -65.91(8)  |
| C(2)-C(1)-C(10)-C(9)   | 171.50(6)  |
| C(2)-C(1)-C(10)-C(5)   | 56.29(8)   |
| C(11)-C(9)-C(10)-C(19) | -62.39(8)  |
| C(8)-C(9)-C(10)-C(19)  | 65.76(7)   |
| C(11)-C(9)-C(10)-C(1)  | 59.58(8)   |
| C(8)-C(9)-C(10)-C(1)   | -172.28(6) |
| C(11)-C(9)-C(10)-C(5)  | 175.06(6)  |
| C(8)-C(9)-C(10)-C(5)   | -56.80(7)  |
| C(6)-C(5)-C(10)-C(19)  | -63.57(8)  |
| C(4)-C(5)-C(10)-C(19)  | 63.55(7)   |
| C(6)-C(5)-C(10)-C(1)   | 175.69(6)  |
| C(4)-C(5)-C(10)-C(1)   | -57.18(8)  |
| C(6)-C(5)-C(10)-C(9)   | 58.19(7)   |
| C(4)-C(5)-C(10)-C(9)   | -174.69(6) |
| C(10)-C(9)-C(11)-O(11) | 7.28(12)   |
| C(8)-C(9)-C(11)-O(11)  | -122.86(9) |
| C(10)-C(9)-C(11)-C(12) | -174.61(6) |

|                         |            |
|-------------------------|------------|
| C(8)-C(9)-C(11)-C(12)   | 55.25(9)   |
| O(11)-C(11)-C(12)-C(13) | 120.46(9)  |
| C(9)-C(11)-C(12)-C(13)  | -57.72(9)  |
| C(11)-C(12)-C(13)-C(17) | 169.60(6)  |
| C(11)-C(12)-C(13)-C(18) | -67.59(7)  |
| C(11)-C(12)-C(13)-C(14) | 56.40(8)   |
| C(7)-C(8)-C(14)-C(15)   | -55.59(8)  |
| C(9)-C(8)-C(14)-C(15)   | -177.27(6) |
| C(7)-C(8)-C(14)-C(13)   | -179.97(6) |
| C(9)-C(8)-C(14)-C(13)   | 58.35(7)   |
| C(17)-C(13)-C(14)-C(8)  | 174.18(6)  |
| C(12)-C(13)-C(14)-C(8)  | -61.25(7)  |
| C(18)-C(13)-C(14)-C(8)  | 60.37(8)   |
| C(17)-C(13)-C(14)-C(15) | 41.62(7)   |
| C(12)-C(13)-C(14)-C(15) | 166.19(6)  |
| C(18)-C(13)-C(14)-C(15) | -72.18(7)  |
| C(8)-C(14)-C(15)-C(16)  | -170.38(6) |
| C(13)-C(14)-C(15)-C(16) | -41.24(7)  |
| C(14)-C(15)-C(16)-C(17) | 24.33(7)   |
| C(15)-C(16)-C(17)-C(20) | 179.83(8)  |
| C(15)-C(16)-C(17)-C(13) | 1.51(8)    |
| C(12)-C(13)-C(17)-C(20) | 38.40(11)  |
| C(18)-C(13)-C(17)-C(20) | -85.74(10) |
| C(14)-C(13)-C(17)-C(20) | 155.56(8)  |
| C(12)-C(13)-C(17)-C(16) | -143.41(7) |
| C(18)-C(13)-C(17)-C(16) | 92.45(7)   |
| C(14)-C(13)-C(17)-C(16) | -26.25(7)  |
| C(16)-C(17)-C(20)-C(21) | -175.71(9) |
| C(13)-C(17)-C(20)-C(21) | 2.26(15)   |
| C(17)-C(20)-C(21)-N(21) | 133(3)     |

---

Projection view with 50% thermal ellipsoids:

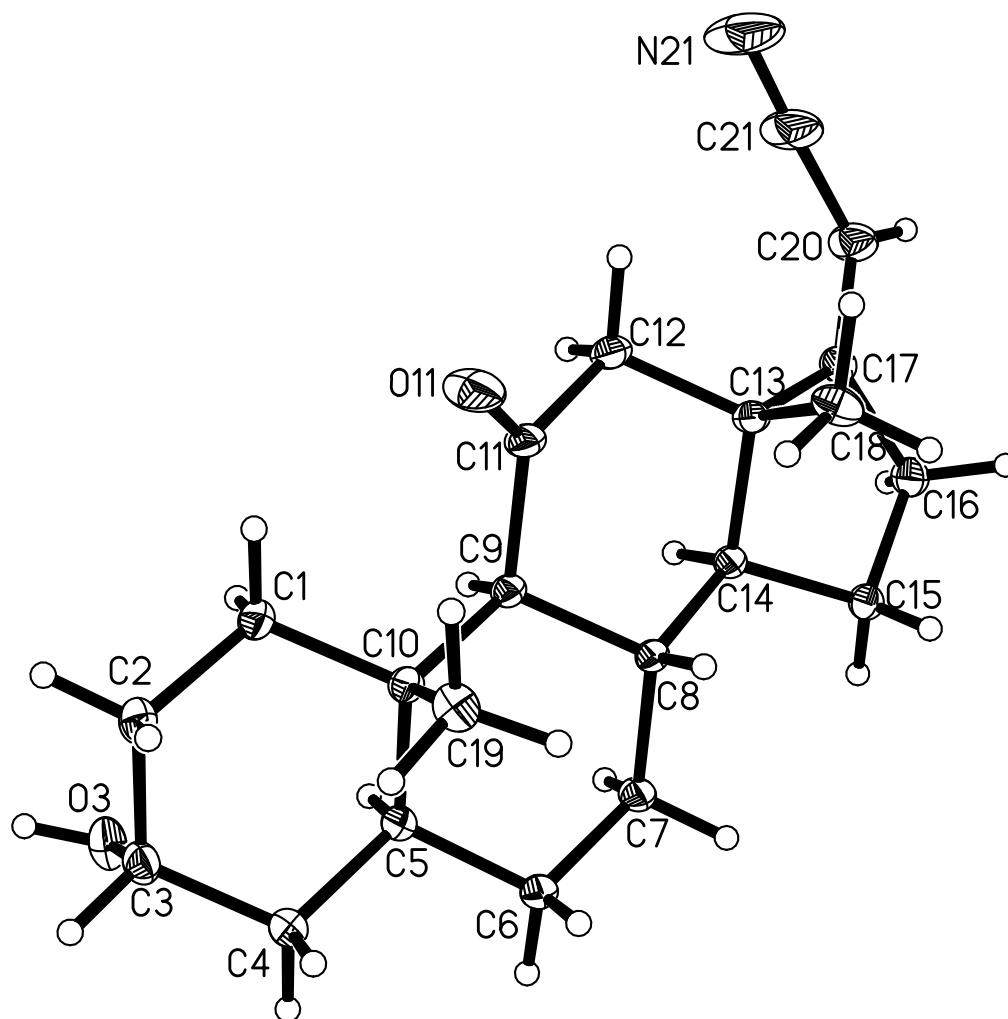

Supplement: NIHMS515804-supplement-1.pdf [file NIHMS515804-supplement-1.pdf]
